# Supplementary material for: Severe Acute Respiratory Syndrome Coronavirus 2 (SARS-CoV-2) Exhibits High Predicted Binding Affinity to ACE2 from Lagomorphs (Rabbits and Pikas)
Source: MDPI journal article supplement (doi:10.3390/ani10091460), 2020-08-20
Supplement: s1 [file s1]

| ACE2 residue | <i>Homo sapiens</i> |     |     |       | <i>Felis catus</i> |     |     |       |     | <i>Canis lupus fam.</i> |     |     |       |     | <i>Oryctolagus cuniculus</i> |     |     |       |     |
|--------------|---------------------|-----|-----|-------|--------------------|-----|-----|-------|-----|-------------------------|-----|-----|-------|-----|------------------------------|-----|-----|-------|-----|
|              | aa1                 | aa2 | num | dist  | aa1                | aa2 | num | dist  | var | aa1                     | aa2 | num | dist  | var | aa1                          | aa2 | num | dist  | var |
| 24           | GLN                 | ALA | 475 | 3.695 | LEU                | ALA | 475 | 3.079 | -   | LEU                     | ALA | 475 | 3.073 | -   | LEU                          | ALA | 475 | 3.060 | -   |
|              | GLN                 | GLY | 476 | 4.121 | LEU                | GLY | 476 | 3.465 | -   | LEU                     | GLY | 476 | 3.546 | -   | LEU                          | GLY | 476 | 3.453 | -   |
|              | GLN                 | ASN | 487 | 2.954 | LEU                | ASN | 487 | 3.617 | +   | LEU                     | ASN | 487 | 3.745 | +   | LEU                          | ASN | 487 | 3.610 | +   |
| 27           | THR                 | PHE | 456 | 3.553 |                    |     |     |       |     |                         |     |     |       |     |                              |     |     |       |     |
|              | THR                 | ALA | 475 | 3.890 |                    |     |     |       |     |                         |     |     |       |     |                              |     |     |       |     |
|              | THR                 | TYR | 489 | 3.637 |                    |     |     |       |     |                         |     |     |       |     |                              |     |     |       |     |
| 28           | PHE                 | TYR | 489 | 3.526 |                    |     |     |       |     |                         |     |     |       |     |                              |     |     |       |     |
|              | PHE                 | TYR | 489 | 3.531 |                    |     |     |       |     |                         |     |     |       |     |                              |     |     |       |     |
| 30           | ASP                 | LYS | 417 | 2.547 | GLU                | LYS | 417 | 2.614 | +   | GLU                     | LYS | 417 | 3.035 | +   | GLU                          | LYS | 417 | 2.574 | +   |
|              |                     |     |     |       | GLU                | LEU | 455 | 3.328 | -   |                         |     |     |       |     | GLU                          | LEU | 455 | 3.302 | -   |
|              | ASP                 | PHE | 456 | 3.886 | GLU                | PHE | 456 | 3.574 | -   | GLU                     | PHE | 456 | 3.357 | -   | GLU                          | PHE | 456 | 3.567 | -   |
| 31           | LYS                 | TYR | 489 | 3.993 |                    |     |     |       |     |                         |     |     |       |     |                              |     |     |       |     |
| 34           | HIS                 | TYR | 453 | 2.936 |                    |     |     |       |     | TYR                     | TYR | 453 | 3.055 | +   | GLN                          | TYR | 453 | 2.944 | =   |
|              | HIS                 | LEU | 455 | 3.336 |                    |     |     |       |     | TYR                     | LEU | 455 | 3.284 | -   | GLN                          | LEU | 455 | 3.908 | +   |
|              | HIS                 | GLN | 493 | 3.606 |                    |     |     |       |     | TYR                     | GLN | 493 | 3.707 | +   | GLN                          | GLN | 493 | 3.694 | +   |
| 38           | ASP                 | TYR | 449 | 2.560 | GLU                | TYR | 449 | 3.339 | +   | GLU                     | TYR | 449 | 3.344 | +   |                              |     |     |       |     |
|              | ASP                 | GLY | 496 | 3.357 | GLU                | GLY | 496 | 2.592 | -   | GLU                     | GLY | 496 | 2.600 | -   |                              |     |     |       |     |
| 41           | TYR                 | GLN | 498 | 3.937 |                    |     |     |       |     |                         |     |     |       |     |                              |     |     |       |     |
|              | TYR                 | THR | 500 | 2.866 |                    |     |     |       |     |                         |     |     |       |     |                              |     |     |       |     |
|              | TYR                 | ASN | 501 | 2.831 |                    |     |     |       |     |                         |     |     |       |     |                              |     |     |       |     |
| 42           | GLN                 | GLY | 446 | 3.361 |                    |     |     |       |     |                         |     |     |       |     |                              |     |     |       |     |
|              | GLN                 | TYR | 449 | 2.882 |                    |     |     |       |     |                         |     |     |       |     |                              |     |     |       |     |
|              | GLN                 | GLN | 498 | 3.212 |                    |     |     |       |     |                         |     |     |       |     |                              |     |     |       |     |
| 79           |                     |     |     |       |                    |     |     |       |     |                         |     |     |       |     |                              |     |     |       |     |
| 82           | MET                 | PHE | 486 | 3.545 | THR                | PHE | 486 | 2.968 | -   | THR                     | PHE | 486 | 2.970 | -   | THR                          | PHE | 486 | 2.976 | -   |
| 83           | TYR                 | PHE | 486 | 3.232 |                    |     |     |       |     |                         |     |     |       |     |                              |     |     |       |     |
|              | TYR                 | ASN | 487 | 2.947 |                    |     |     |       |     |                         |     |     |       |     |                              |     |     |       |     |
| 353          | LYS                 | GLY | 496 | 2.899 |                    |     |     |       |     |                         |     |     |       |     |                              |     |     |       |     |
|              | LYS                 | ASN | 501 | 3.762 |                    |     |     |       |     |                         |     |     |       |     |                              |     |     |       |     |
|              | LYS                 | GLY | 502 | 2.847 |                    |     |     |       |     |                         |     |     |       |     |                              |     |     |       |     |
|              | LYS                 | TYR | 505 | 3.339 |                    |     |     |       |     |                         |     |     |       |     |                              |     |     |       |     |
| 354          | GLY                 |     |     |       |                    |     |     |       |     |                         |     |     |       |     |                              |     |     |       |     |
|              | GLY                 |     |     |       |                    |     |     |       |     |                         |     |     |       |     |                              |     |     |       |     |
|              | GLY                 |     |     |       |                    |     |     |       |     |                         |     |     |       |     |                              |     |     |       |     |
|              | GLY                 |     |     |       |                    |     |     |       |     |                         |     |     |       |     |                              |     |     |       |     |
| 355          | ASP                 | THR | 500 | 3.503 |                    |     |     |       |     |                         |     |     |       |     |                              |     |     |       |     |
| 357          | ARG                 | THR | 500 | 3.437 |                    |     |     |       |     |                         |     |     |       |     |                              |     |     |       |     |

#### Distances among residues involved in contacts between ACE2 and SARS-CoV-2 calculated by Chimera software.

Data are reported only for residues showing substitutions. The lowest distance is reported when an ACE2 residue shows more than one contact with the same SARS-CoV-2 residue.

**Legend:** aa1 is ACE2 aminoacid; aa2 is SARS-CoV-2 RBD aminoacid; num is the number of the aa2 position in the SARS-CoV-2 spike protein; dist is the predicted distance between aa1 and aa2 expressed in Angstrom; var is the variation of the distance in comparison with humans

(+) means a longer distance, (-) means a shorter distance, (=) means that no significant difference between distances was observed in comparison with contacts between human ACE2 and SARS-CoV-2

|              | <i>Homo sapiens</i> |     |     |       |  | <i>Ochotona princeps</i> |     |     |       |     | <i>Cricetulus griseus</i> |     |     |     |       | <i>Mesocricetus auratus</i> |  |     |     |     |       |     |
|--------------|---------------------|-----|-----|-------|--|--------------------------|-----|-----|-------|-----|---------------------------|-----|-----|-----|-------|-----------------------------|--|-----|-----|-----|-------|-----|
| ACE2 residue | aa1                 | aa2 | num | dist  |  | aa1                      | aa2 | num | dist  | var |                           | aa1 | aa2 | num | dist  | var                         |  | aa1 | aa2 | num | dist  | var |
| 24           | GLN                 | ALA | 475 | 3.695 |  | LEU                      | ALA | 475 | 3.073 | -   |                           |     |     |     |       |                             |  |     |     |     |       |     |
|              | GLN                 | GLY | 476 | 4.121 |  | LEU                      | GLY | 476 | 3.459 | -   |                           |     |     |     |       |                             |  |     |     |     |       |     |
|              | GLN                 | ASN | 487 | 2.954 |  | LEU                      | ASN | 487 | 3.624 | +   |                           |     |     |     |       |                             |  |     |     |     |       |     |
| 27           | THR                 | PHE | 456 | 3.553 |  |                          |     |     |       |     |                           |     |     |     |       |                             |  |     |     |     |       |     |
|              | THR                 | ALA | 475 | 3.890 |  |                          |     |     |       |     |                           |     |     |     |       |                             |  |     |     |     |       |     |
|              | THR                 | TYR | 489 | 3.637 |  |                          |     |     |       |     |                           |     |     |     |       |                             |  |     |     |     |       |     |
| 28           | PHE                 | TYR | 489 | 3.526 |  |                          |     |     |       |     |                           |     |     |     |       |                             |  |     |     |     |       |     |
|              | PHE                 | TYR | 489 | 3.531 |  |                          |     |     |       |     |                           |     |     |     |       |                             |  |     |     |     |       |     |
| 30           | ASP                 | LYS | 417 | 2.547 |  |                          |     |     |       |     |                           |     |     |     |       |                             |  |     |     |     |       |     |
|              | ASP                 | PHE | 456 | 3.886 |  |                          |     |     |       |     |                           |     |     |     |       |                             |  |     |     |     |       |     |
| 31           | LYS                 | TYR | 489 | 3.993 |  |                          |     |     |       |     |                           |     |     |     |       |                             |  |     |     |     |       |     |
| 34           | HIS                 | TYR | 453 | 2.936 |  | GLN                      | TYR | 453 | 2.914 | -   |                           | GLN | TYR | 453 | 2.925 | -                           |  | GLN | TYR | 453 | 2.925 | -   |
|              | HIS                 | LEU | 455 | 3.336 |  | GLN                      | LEU | 455 | 3.921 | -   |                           | GLN | LEU | 455 | 3.919 | +                           |  | GLN | LEU | 455 | 3.919 | +   |
|              | HIS                 | GLN | 493 | 3.606 |  | GLN                      | GLN | 493 | 3.694 | +   |                           | GLN | GLN | 493 | 3.691 | +                           |  | GLN | GLN | 493 | 3.691 | +   |
| 38           | ASP                 | TYR | 449 | 2.560 |  |                          |     |     |       |     |                           |     |     |     |       |                             |  |     |     |     |       |     |
|              | ASP                 | GLY | 496 | 3.357 |  |                          |     |     |       |     |                           |     |     |     |       |                             |  |     |     |     |       |     |
| 41           | TYR                 | GLN | 498 | 3.937 |  |                          |     |     |       |     |                           |     |     |     |       |                             |  |     |     |     |       |     |
|              | TYR                 | THR | 500 | 2.866 |  |                          |     |     |       |     |                           |     |     |     |       |                             |  |     |     |     |       |     |
|              | TYR                 | ASN | 501 | 2.831 |  |                          |     |     |       |     |                           |     |     |     |       |                             |  |     |     |     |       |     |
| 42           | GLN                 | GLY | 446 | 3.361 |  |                          |     |     |       |     |                           |     |     |     |       |                             |  |     |     |     |       |     |
|              | GLN                 | TYR | 449 | 2.882 |  |                          |     |     |       |     |                           |     |     |     |       |                             |  |     |     |     |       |     |
|              | GLN                 | GLN | 498 | 3.212 |  |                          |     |     |       |     |                           |     |     |     |       |                             |  |     |     |     |       |     |
| 79           |                     |     |     |       |  |                          |     |     |       |     |                           |     |     |     |       |                             |  |     |     |     |       |     |
| 82           | MET                 | PHE | 486 | 3.545 |  | THR                      | PHE | 486 | 2.960 | -   |                           | ASN | PHE | 486 | 3.575 | +                           |  | ASN | PHE | 486 | 3.575 | +   |
| 83           | TYR                 | PHE | 486 | 3.232 |  |                          |     |     |       |     |                           |     |     |     |       |                             |  |     |     |     |       |     |
|              | TYR                 | ASN | 487 | 2.947 |  |                          |     |     |       |     |                           |     |     |     |       |                             |  |     |     |     |       |     |
| 353          | LYS                 | GLY | 496 | 2.899 |  |                          |     |     |       |     |                           |     |     |     |       |                             |  |     |     |     |       |     |
|              | LYS                 | ASN | 501 | 3.762 |  |                          |     |     |       |     |                           |     |     |     |       |                             |  |     |     |     |       |     |
|              | LYS                 | GLY | 502 | 2.847 |  |                          |     |     |       |     |                           |     |     |     |       |                             |  |     |     |     |       |     |
|              | LYS                 | TYR | 505 | 3.339 |  |                          |     |     |       |     |                           |     |     |     |       |                             |  |     |     |     |       |     |
| 354          | GLY                 |     |     |       |  |                          |     |     |       |     |                           |     |     |     |       |                             |  |     |     |     |       |     |
|              | GLY                 |     |     |       |  | ASP                      | GLY | 502 | 3.757 | -   |                           |     |     |     |       |                             |  |     |     |     |       |     |
|              | GLY                 |     |     |       |  | ASP                      | VAL | 503 | 3.417 | -   |                           |     |     |     |       |                             |  |     |     |     |       |     |
|              | GLY                 |     |     |       |  | ASP                      | TYR | 505 | 3.696 | -   |                           |     |     |     |       |                             |  |     |     |     |       |     |
| 355          | ASP                 | THR | 500 | 3.503 |  |                          |     |     |       |     |                           |     |     |     |       |                             |  |     |     |     |       |     |
| 357          | ARG                 | THR | 500 | 3.437 |  |                          |     |     |       |     |                           |     |     |     |       |                             |  |     |     |     |       |     |

| ACE2 residue | <i>Homo sapiens</i> |     |     |       | <i>Mus musculus</i> |     |     |       |     | <i>Rattus norvegicus</i> |     |     |       |     | <i>Mustela putorius furo</i> |     |     |       |     |
|--------------|---------------------|-----|-----|-------|---------------------|-----|-----|-------|-----|--------------------------|-----|-----|-------|-----|------------------------------|-----|-----|-------|-----|
|              | aa1                 | aa2 | num | dist  | aa1                 | aa2 | num | dist  | var | aa1                      | aa2 | num | dist  | var | aa1                          | aa2 | num | dist  | var |
| 24           | GLN                 | ALA | 475 | 3.695 | ASN                 | ALA | 475 | 2.928 | -   |                          |     |     |       |     | LEU                          | ALA | 475 | 3.054 | -   |
|              | GLN                 | GLY | 476 | 4.121 |                     |     |     |       |     | LYS                      | GLY | 476 | 3.840 | +   | LEU                          | GLY | 476 | 3.518 | -   |
|              | GLN                 | ASN | 487 | 2.954 | ASN                 | ASN | 487 | 3.692 | +   | LYS                      | ASN | 487 | 3.348 | +   | LEU                          | ASN | 487 | 3.695 | +   |
| 27           | THR                 | PHE | 456 | 3.553 |                     |     |     |       |     |                          |     |     |       |     |                              |     |     |       |     |
|              | THR                 | ALA | 475 | 3.890 |                     |     |     |       |     | SER                      | ALA | 475 | 3.376 | -   |                              |     |     |       |     |
|              | THR                 | TYR | 489 | 3.637 |                     |     |     |       |     |                          |     |     |       |     |                              |     |     |       |     |
| 28           | PHE                 | TYR | 489 | 3.526 |                     |     |     |       |     |                          |     |     |       |     |                              |     |     |       |     |
|              | PHE                 | TYR | 489 | 3.531 |                     |     |     |       |     |                          |     |     |       |     |                              |     |     |       |     |
| 30           | ASP                 | LYS | 417 | 2.547 |                     |     |     |       |     |                          |     |     |       |     | GLU                          | LYS | 417 | 3.154 | +   |
|              | ASP                 | PHE | 456 | 3.886 | ASN                 | PHE | 456 | 3.850 | -   | ASN                      | PHE | 456 | 3.857 | -   |                              |     |     |       |     |
| 31           | LYS                 | TYR | 489 | 3.993 | LYS                 | TYR | 489 | 4.012 | +   |                          |     |     |       |     |                              |     |     |       |     |
| 34           | HIS                 | TYR | 453 | 2.936 | GLN                 | TYR | 453 | 2.876 | -   | GLN                      | TYR | 453 | 2.886 | -   | TYR                          | TYR | 453 | 3.054 | +   |
|              | HIS                 | LEU | 455 | 3.336 | GLN                 | LEU | 455 | 3.920 | +   | GLN                      | LEU | 455 | 3.920 | +   | TYR                          | LEU | 455 | 3.266 | -   |
|              | HIS                 | GLN | 493 | 3.606 | GLN                 | GLN | 493 | 3.684 | +   | GLN                      | GLN | 493 | 3.697 | +   | TYR                          | GLN | 493 | 3.649 | +   |
| 38           | ASP                 | TYR | 449 | 2.560 |                     |     |     |       |     |                          |     |     |       |     | GLU                          | TYR | 449 | 3.353 | +   |
|              | ASP                 | GLY | 496 | 3.357 |                     |     |     |       |     |                          |     |     |       |     | GLU                          | GLY | 496 | 2.617 | -   |
| 41           | TYR                 | GLN | 498 | 3.937 |                     |     |     |       |     |                          |     |     |       |     |                              |     |     |       |     |
|              | TYR                 | THR | 500 | 2.866 |                     |     |     |       |     |                          |     |     |       |     |                              |     |     |       |     |
|              | TYR                 | ASN | 501 | 2.831 |                     |     |     |       |     |                          |     |     |       |     |                              |     |     |       |     |
| 42           | GLN                 | GLY | 446 | 3.361 |                     |     |     |       |     |                          |     |     |       |     |                              |     |     |       |     |
|              | GLN                 | TYR | 449 | 2.882 |                     |     |     |       |     |                          |     |     |       |     |                              |     |     |       |     |
|              | GLN                 | GLN | 498 | 3.212 |                     |     |     |       |     |                          |     |     |       |     |                              |     |     |       |     |
| 79           |                     |     |     |       | THR                 |     |     |       |     | ILE                      |     |     |       |     | HIS                          |     |     |       |     |
| 82           | MET                 | PHE | 486 | 3.545 | SER                 | PHE | 486 | 3.602 | +   | ASN                      | PHE | 486 | 3.584 | +   | THR                          | PHE | 486 | 2.944 | -   |
| 83           | TYR                 | PHE | 486 | 3.232 | PHE                 | PHE | 486 | 3.446 | +   | PHE                      | PHE | 486 | 3.453 | +   |                              |     |     |       |     |
|              | TYR                 | ASN | 487 | 2.947 |                     |     |     |       |     |                          |     |     |       |     |                              |     |     |       |     |
| 353          | LYS                 | GLY | 496 | 2.899 |                     |     |     |       |     |                          |     |     |       |     |                              |     |     |       |     |
|              | LYS                 | ASN | 501 | 3.762 | HIS                 | ASN | 501 | 3.741 | +   | HIS                      | ASN | 501 | 3.737 | +   |                              |     |     |       |     |
|              | LYS                 | GLY | 502 | 2.847 | HIS                 | GLY | 502 | 2.853 | -   | HIS                      | GLY | 502 | 2.849 | -   |                              |     |     |       |     |
|              | LYS                 | TYR | 505 | 3.339 | HIS                 | TYR | 505 | 3.370 | +   | HIS                      | TYR | 505 | 3.367 | +   |                              |     |     |       |     |
| 354          | GLY                 |     |     |       |                     |     |     |       |     |                          |     |     |       |     | ARG                          | ASP | 405 | 2.858 | -   |
|              | GLY                 |     |     |       |                     |     |     |       |     |                          |     |     |       |     | ARG                          | GLY | 502 | 3.483 | -   |
|              | GLY                 |     |     |       |                     |     |     |       |     |                          |     |     |       |     |                              |     |     |       |     |
|              | GLY                 |     |     |       |                     |     |     |       |     |                          |     |     |       |     | ARG                          | TYR | 505 | 3.400 | -   |
| 355          | ASP                 | THR | 500 | 3.503 |                     |     |     |       |     |                          |     |     |       |     |                              |     |     |       |     |
| 357          | ARG                 | THR | 500 | 3.437 |                     |     |     |       |     |                          |     |     |       |     |                              |     |     |       |     |
