# Supplementary material for: Severe Acute Respiratory Syndrome Coronavirus 2 (SARS-CoV-2) Exhibits High Predicted Binding Affinity to ACE2 from Lagomorphs (Rabbits and Pikas)
Source: MDPI journal article supplement (doi:10.3390/ani10091460), 2020-08-20
Supplement: s1 [file s1]

|                                         | 1     | 2     | 3     | 4     | 5     | 6     | 7     | 8     | 9     |
|-----------------------------------------|-------|-------|-------|-------|-------|-------|-------|-------|-------|
| 1 NP_001358344.1_Homo_sapiens           |       |       |       |       |       |       |       |       |       |
| 2 XP_023104564.1_Felis_catus            | 0.206 |       |       |       |       |       |       |       |       |
| 3 NP_001158732.1_Canis_lupus_familiaris | 0.265 | 0.049 |       |       |       |       |       |       |       |
| 4 XP_002719891.1_Oryctolagus_cuniculus  | 0.207 | 0.098 | 0.109 |       |       |       |       |       |       |
| 5 XP_004597549.2_Ochotona_princeps      | 0.209 | 0.204 | 0.224 | 0.099 |       |       |       |       |       |
| 6 XP_003503283.1_Cricetulus_griseus     | 0.103 | 0.263 | 0.289 | 0.154 | 0.155 |       |       |       |       |
| 7 XP_005074266.1_Mesocricetus_auratus   | 0.103 | 0.263 | 0.289 | 0.154 | 0.155 | 0     |       |       |       |
| 8 NP_081562.2_Mus_musculus              | 0.549 | 0.639 | 0.695 | 0.494 | 0.53  | 0.433 | 0.433 |       |       |
| 9 NP_001012006.1_Rattus_norvegicus      | 0.494 | 0.615 | 0.669 | 0.473 | 0.509 | 0.336 | 0.336 | 0.242 |       |
| 10 NP_001297119.1_Mustela_putorius_furo | 0.392 | 0.154 | 0.103 | 0.227 | 0.315 | 0.424 | 0.424 | 0.765 | 0.801 |

Estimates of Evolutionary Divergence between Sequences. Only 22 residues corresponding to the sites of contact between SARS-CoV-2 RBD and ACE2 were considered. The number of amino acid substitutions per site from between sequences are shown. Analyses were conducted using the JTT matrix-based model. The rate variation among sites was modeled with a gamma distribution (shape parameter = 5).
