# Supplementary material for: Severe Acute Respiratory Syndrome Coronavirus 2 (SARS-CoV-2) Exhibits High Predicted Binding Affinity to ACE2 from Lagomorphs (Rabbits and Pikas)
Source: MDPI journal article supplement (doi:10.3390/ani10091460), 2020-08-20
Supplement: s1 [file s1]

A

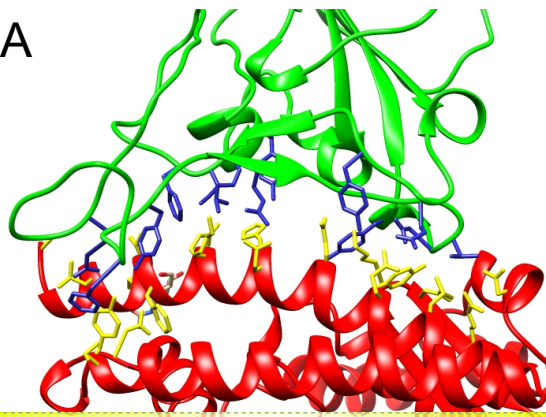

cat ACE2-SARS-CoV-2

Structure simulation of the complex SARS-CoV-2-ACE2 of cats (A), dogs (B), Chinese hamsters (C), golden Syrian hamsters (D), mice (E), rats (F) and ferrets (G).

B

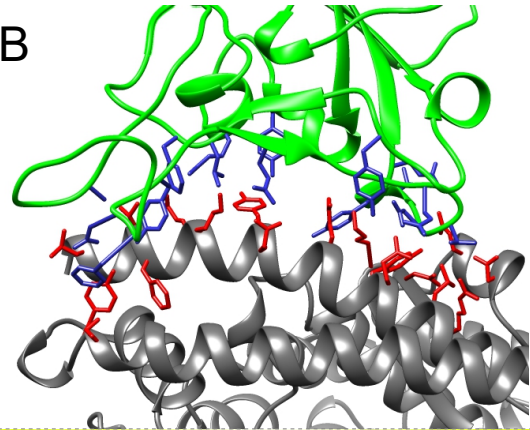

dog ACE2-SARS-CoV-2

C

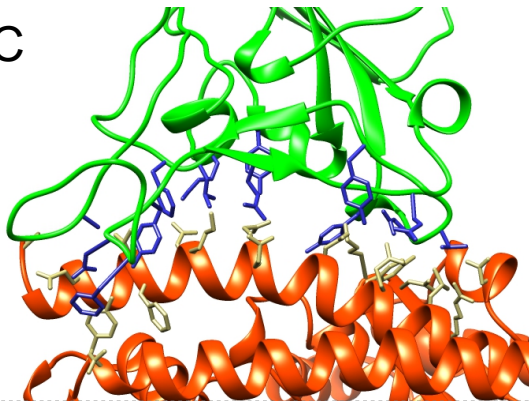

Chinese hamster ACE2-SARS-CoV-2

D

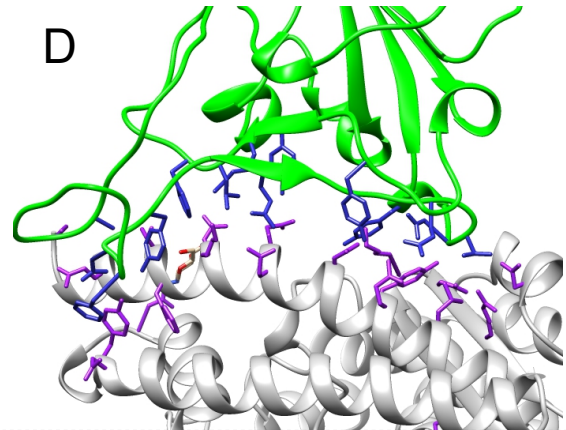

golden Syrian hamster ACE2-SARS-CoV-2

E

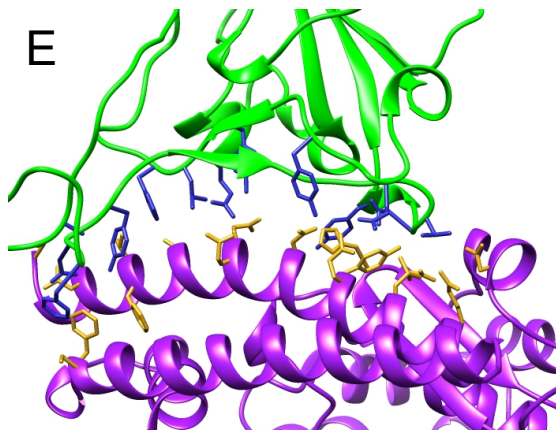

mouse ACE2-SARS-CoV-2

F

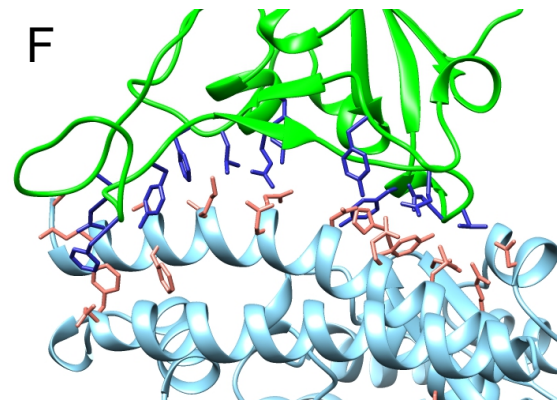

rat ACE2-SARS-CoV-2

G

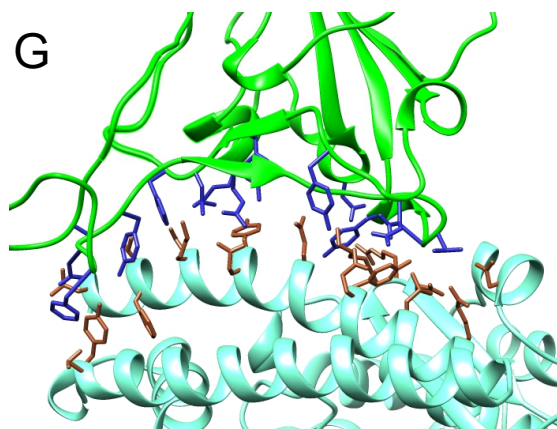

ferret ACE2-SARS-CoV-2
